# Supplementary material
Source: publisher figshare collection journal article supplement (https://acs.figshare.com/ndownloader/files/4668166)
Supplement: Supplementary file 1 [file 4668166]

# Atomistic simulation of the DNA helix-coil transition.

*Stefano Piana*

Nanochemistry Research Institute, Curtin University of Technology, GPO Box

U1987, 6845 Perth, WA. Australia. [piana@ivec.org](mailto:piana@ivec.org)

## SUPPLEMENTARY MATERIAL

### Definition of the collective variables used in the Bias Exchange simulation.

In order to perform an enhanced sampling simulation a set of variables that describe the reaction must be selected. The helix to coil transition is a complex process that involves changes in the base-base pairing and changes in the DNA strand structure. In this work, the space of conformations was defined by 6 collective variables. These six collective variables were of two types: one describing the process of formation and rupture of DNA base pairs, and one describing the conformation of the DNA phosphate backbone.

The first type is a coordination variable that is related to the distance between two atoms or two groups of atoms:

$$N_{AB} = \sum_{i=1}^{N_A} \sum_{j=1}^{N_B} \frac{1 - \frac{r_{ij}^8}{r_0^8}}{1 - \frac{r_{ij}^{10}}{r_0^{10}}}$$

where  $r_{ij}$  is the distance between atoms  $i$  and  $j$  and  $r_0$  is a cutoff distance. The variable can assume any value between 0 (no pairs within the cutoff distance) and the total number of all possible pairs. Two variables of this type were used: one to describe the formation of A-T pairs and one to describe the formation of C-G pairs. The distance used to define the formation of a pair is the distance between the central nitrogens of the A-T and of the C-G base pairs and the cutoff distance was  $r_0 = 4.0 \text{ \AA}$ . The width of the Gaussians for this collective variable was 0.5. The height of the Gaussians was  $0.1 \text{ kJ mol}^{-1}$  for all the collective variables.

The second type of collective variables describes the conformation of the phosphate backbone. This type is defined as:

$$\Phi = \sum_{i=1}^N \sqrt{1 + \cos^2\left(\frac{\varphi_i - \varphi_{i-1}}{2}\right)}$$

where  $\Phi$  can range from  $N\sqrt{2}$ , if all consecutive dihedrals have the same value (as for the phosphate backbone angles in B-DNA), to  $N$  if all consecutive dihedrals have different values. 4 variables of this type have been used, two for each DNA strand. The first runs over the  $\angle O3'-P-O5'-C5'$  phosphate backbone dihedral angles ( $\alpha$ ) and the second between the  $\angle C3'-O3'-P-O5'$  phosphate backbone dihedral angles ( $\zeta$ ). The width of the Gaussians for these collective variables was 0.05.

Calculations performed with the Amber99 force field indicated that the collective variables acting on  $\alpha$  and  $\zeta$  dihedrals are highly correlated. For this reason, in the subsequent set of calculations performed with the modified Amber99 force field the  $\zeta$  variable was not used. The reduction in the total number of collective variables improves the convergence properties of the BE-META simulations.
